# Supplementary material for: Preparation of Dufulin imprinted polymer on surface of silica gel and its application as solid-phase extraction sorbent
Source: Royal Society of Chemistry journal article supplement (doi:10.1039/c3em00519d), 2014-01-01
Supplement: c3em00519d.pdf [file c3em00519d.pdf]

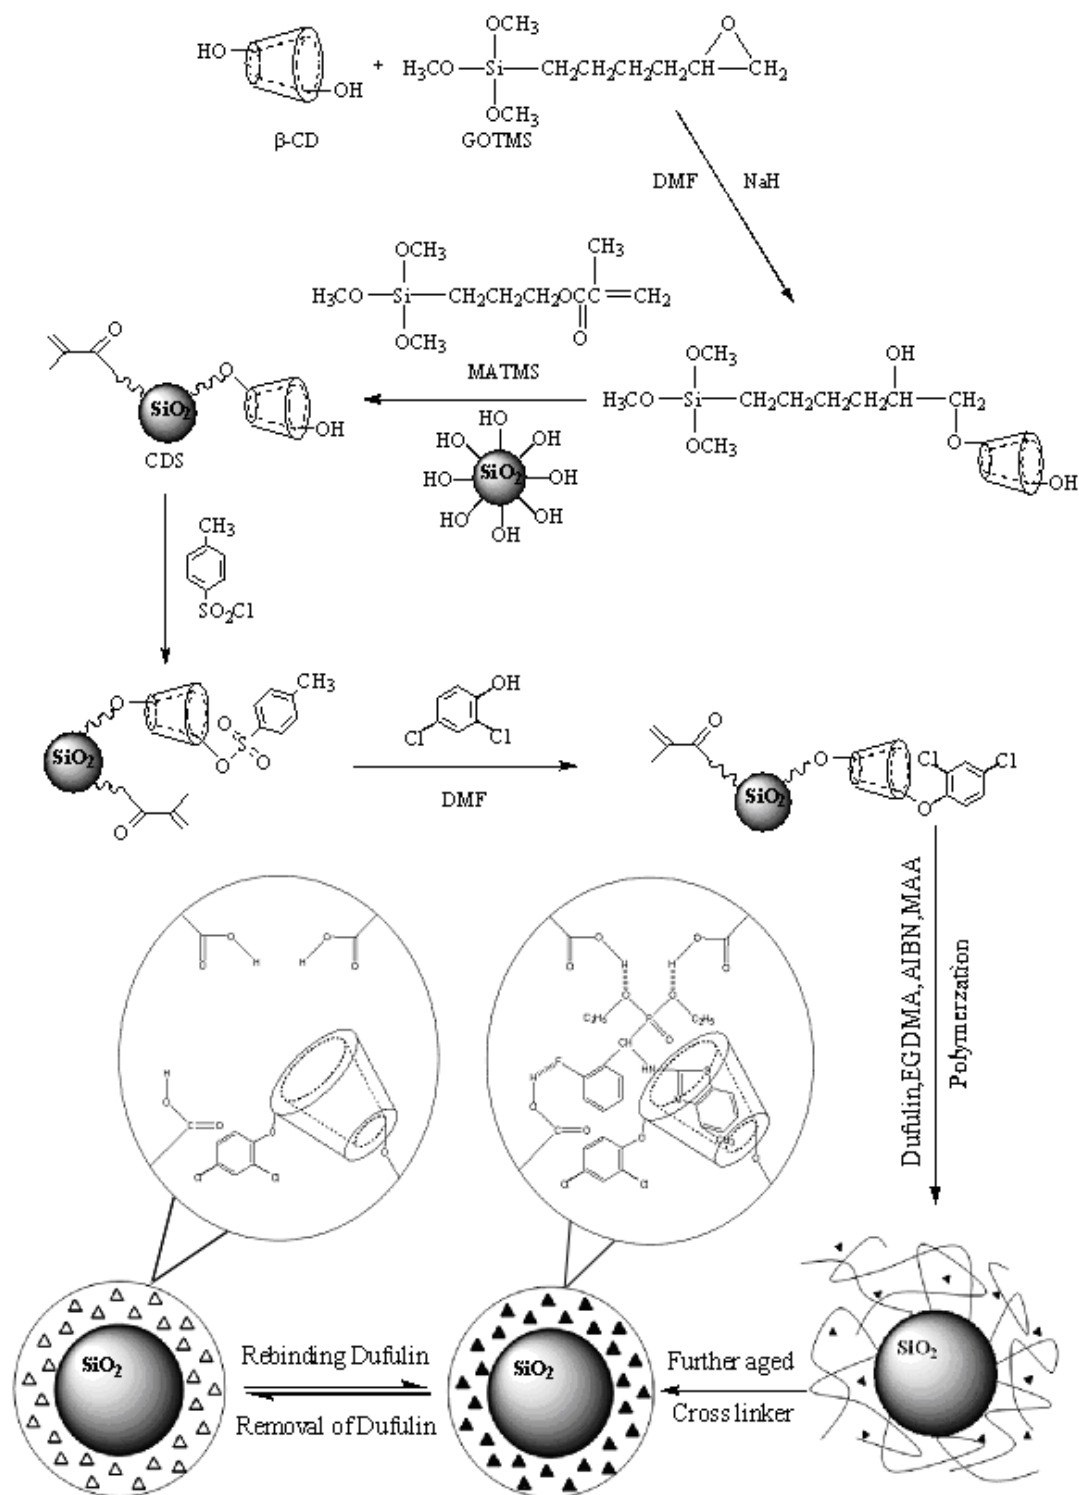

Supplemental Fig. S1 Schematic illustration for the fabrication and formation mechanism of Dufulin-imprinted polymer at surface of silica gel
